# Supplementary material for: Ganghuo Kanggan Decoction in Influenza: Integrating Network Pharmacology and In Vivo Pharmacological Evaluation
Source: Front Pharmacol. 2020 Dec 10;11:607027. doi: 10.3389/fphar.2020.607027 (PMC7759152; doi:10.3389/fphar.2020.607027)
Supplement: Supplementary file 1 [file table1.xlsx]

## Sheet: 工作表1
Mol ID	Molecule Name	MW	AlogP	Hdon	Hacc	OB (%)	DL
MOL008846	ZINC01280365	330.51	3.12	1	3	46.38	0.49
MOL008845	Deoxycholic Acid	392.64	4.06	3	4	40.72	0.68
MOL000953	CLR	386.73	7.38	1	1	37.87	0.68
MOL008839	Methyl desoxycholate	406.67	4.31	2	4	34.63	0.73
MOL008838	methyl (4R)-4-[(3R,5S,7S,8R,9S,10S,12S,13R,14S,17R)-3,7,12-trihydroxy-10,13-dimethyl-2,3,4,5,6,7,8,9,11,12,14,15,16,17-tetradecahydro-1H-cyclopenta[a]phenanthren-17-yl]pentanoate	422.67	3.14	3	5	32.32	0.76
MOL011856	Schkuhrin I	420.5	1.81	2	8	54.45	0.52
MOL005100	5,7-dihydroxy-2-(3-hydroxy-4-methoxyphenyl)chroman-4-one	302.3	2.28	3	6	47.74	0.27
MOL000098	quercetin	302.25	1.5	5	7	46.43	0.28
MOL000432	linolenic acid	278.48	5.95	1	2	45.01	0.15
MOL000449	Stigmasterol	412.77	7.64	1	1	43.83	0.76
MOL005043	campest-5-en-3beta-ol	400.76	7.63	1	1	37.58	0.71
MOL000359	sitosterol	414.79	8.08	1	1	36.91	0.75
MOL000358	beta-sitosterol	414.79	8.08	1	1	36.91	0.75
MOL000006	luteolin	286.25	2.07	4	6	36.16	0.25
MOL001506	Supraene	410.8	11.33	0	0	33.55	0.42
MOL002881	Diosmetin	300.28	2.32	3	6	31.14	0.27
MOL011849	Schizonepetoside B	330.42	-0.49	3	7	31.02	0.28
MOL000187	butenolide B	234.32	2.48	1	3	61	0.15
MOL000044	atractylenolideII	232.35	3.57	0	2	47.5	0.15
MOL000180	Aractylenolide II	232.35	3.1	0	2	46.2	0.15
MOL000179	2-Hydroxyisoxypropyl-3-hydroxy-7-isopentene-2,3-dihydrobenzofuran-5-carboxylic	306.39	2.59	3	5	45.2	0.2
MOL000186	Stigmasterol 3-O-beta-D-glucopyranoside_qt	412.77	7.64	1	1	43.83	0.76
MOL000188	3β-acetoxyatractylone	274.39	3.39	0	3	40.57	0.22
MOL000184	NSC63551	412.77	7.56	0	1	39.25	0.76
MOL000043	atractylenolide i	230.33	3.32	0	2	37.37	0.15
MOL000085	beta-daucosterol_qt	414.79	8.08	1	1	36.91	0.75
MOL000088	beta-sitosterol 3-O-glucoside_qt	414.79	8.08	1	1	36.91	0.75
MOL000092	daucosterin_qt	414.79	8.08	1	1	36.91	0.76
MOL000094	daucosterol_qt	414.79	8.08	1	1	36.91	0.76
MOL000178	atractylenolide iii	248.35	2.93	1	3	31.66	0.17
MOL000181	atractylenolide III	248.35	2.93	1	3	31.15	0.17
MOL000173	wogonin	284.28	2.59	2	5	30.68	0.23
MOL001371	Populoside_qt	286.3	2.94	3	5	108.89	0.2
MOL001351	Gibberellin A44	346.46	1.89	2	5	101.61	0.54
MOL001348	gibberellin 17	378.46	1.49	4	7	94.64	0.49
MOL001353	GA60	348.43	0.73	3	6	93.17	0.53
MOL001349	4a-formyl-7alpha-hydroxy-1-methyl-8-methylidene-4aalpha,4bbeta-gibbane-1alpha,10beta-dicarboxylic acid	362.46	1.54	3	6	88.6	0.46
MOL001344	GA122-isolactone	330.41	1.34	2	5	88.11	0.54
MOL001329	2,3-didehydro GA77	346.41	0.28	3	6	88.08	0.53
MOL001360	GA77	348.43	0.73	3	6	87.89	0.53
MOL001340	GA120	314.41	2.47	1	4	84.85	0.45
MOL001339	GA119	332.43	1.81	2	5	76.36	0.49
MOL001358	gibberellin 7	330.41	1.5	2	5	73.8	0.5
MOL001342	GA121-isolactone	330.41	1.34	2	5	72.7	0.54
MOL001361	GA87	362.41	-0.55	4	7	68.85	0.57
MOL001355	GA63	348.43	0.71	3	6	65.54	0.54
MOL001343	GA122	330.41	1.3	2	5	64.79	0.5
MOL001352	GA54	348.43	0.58	3	6	64.21	0.53
MOL001328	2,3-didehydro GA70	330.41	1.16	2	5	63.29	0.5
MOL001350	GA30	346.41	0.33	3	6	61.72	0.54
MOL001323	Sitosterol alpha1	426.8	8.15	1	1	43.28	0.78
MOL000131	EIC	280.5	6.39	1	2	41.9	0.14
MOL001368	3-O-p-coumaroylquinic acid	338.34	-0.15	5	8	37.63	0.29
MOL000493	campesterol	400.76	7.63	1	1	37.58	0.71
MOL000296	hederagenin	414.79	8.08	1	1	36.91	0.75
MOL002712	6-Hydroxykaempferol	302.25	1.5	5	7	62.13	0.27
MOL002680	Flavoxanthin	584.96	8.24	2	3	60.41	0.56
MOL002717	qt_carthamone	286.25	0.7	3	6	51.03	0.2
MOL002694	4-[(E)-4-(3,5-dimethoxy-4-oxo-1-cyclohexa-2,5-dienylidene)but-2-enylidene]-2,6-dimethoxycyclohexa-2,5-dien-1-one	356.4	0.36	0	6	48.47	0.36
MOL002710	Pyrethrin II	372.5	3.74	0	5	48.36	0.35
MOL001398	Methyllinolenate	292.51	6.2	0	2	46.15	0.17
MOL002757	7,8-dimethyl-1H-pyrimido[5,6-g]quinoxaline-2,4-dione	242.26	0.59	2	6	45.75	0.19
MOL002683	Ligla	278.48	5.95	1	2	45.01	0.15
MOL002721	quercetagetin	318.25	1.24	6	8	45.01	0.31
MOL002695	lignan	458.55	3.78	0	8	43.32	0.65
MOL002707	phytofluene	543.02	14.1	0	0	43.18	0.5
MOL000422	kaempferol	286.25	1.77	4	6	41.88	0.24
MOL002776	Baicalin	446.39	0.64	6	11	40.12	0.75
MOL002706	Phytoene	545.04	14.54	0	0	39.56	0.5
MOL002773	beta-carotene	536.96	12	0	0	37.18	0.58
MOL001771	poriferast-5-en-3beta-ol	414.79	8.08	1	1	36.91	0.75
MOL002698	lupeol-palmitate	665.26	14.38	0	2	33.98	0.32
MOL002714	baicalein	270.25	2.33	3	5	33.52	0.21
MOL002719	6-Hydroxynaringenin	288.27	2.03	4	6	33.23	0.24
MOL000675	oleic acid	282.52	6.84	1	2	33.13	0.14
MOL001789	isoliquiritigenin	256.27	2.9	3	4	85.32	0.15
MOL004644	Sainfuran	286.3	3.38	2	5	79.91	0.23
MOL013187	Cubebin	356.4	3.19	1	6	57.13	0.64
MOL000354	isorhamnetin	316.28	1.76	4	7	49.6	0.31
MOL004609	Areapillin	360.34	2.29	3	8	48.96	0.41
MOL004628	Octalupine	264.41	-0.07	1	4	47.82	0.28
MOL004624	Longikaurin A	348.48	1.16	3	5	47.72	0.53
MOL004653	(+)-Anomalin	426.5	5.05	0	7	46.06	0.66
MOL004718	α-spinasterol	412.77	7.64	1	1	42.98	0.76
MOL001645	Linoleyl acetate	308.56	6.85	0	2	42.1	0.2
MOL000749	Linoleic	280.5	6.39	1	2	41.9	0.14
MOL004683	methyl (2E,4E)-octadeca-2,4-dienoate	294.53	7.06	0	2	38.77	0.17
MOL004598	3,5,6,7-tetramethoxy-2-(3,4,5-trimethoxyphenyl)chromone	432.46	2.54	0	9	31.97	0.59
MOL004648	Troxerutin	346.56	5.89	3	3	31.6	0.28
MOL004702	saikosaponin c_qt	472.78	3.71	3	4	30.5	0.63
MOL000490	petunidin	317.29	1.65	5	7	30.05	0.31
MOL004793	Marmesine	246.28	2.03	1	4	84.77	0.18
MOL011980	Pterostilbene	256.32	3.52	1	3	77.54	0.14
MOL011748	nodakenetin	230.28	3.18	0	3	68.62	0.15
MOL011971	diversoside_qt	332.43	3.11	2	5	67.57	0.31
MOL011975	notoptol	354.43	4.07	1	5	62.97	0.48
MOL004792	nodakenin	408.44	0.28	4	9	57.12	0.69
MOL001944	Marmesin	246.28	2.03	1	4	50.28	0.18
MOL001942	isoimperatorin	270.3	3.65	0	4	45.46	0.23
MOL001641	METHYL LINOLEATE	294.53	6.64	0	2	41.93	0.17
MOL001951	Bergaptin	338.43	5.48	0	4	41.73	0.42
MOL011969	Demethylfuropinnarin	270.3	3.4	1	4	41.31	0.21
MOL011963	8-geranoxy-5-methoxypsoralen	368.46	5.46	0	5	40.97	0.5
MOL002644	Phellopterin	300.33	3.64	0	5	40.19	0.28
MOL011960	14-methylhexadecaoic acid methyl ester	282.52	6.43	0	2	37.72	0.14
MOL011976	2-(4-hydroxyphenyl)ethyl 4-methoxybenzoate	272.32	3.31	1	4	36.63	0.17
MOL001941	Ammidin	270.3	3.65	0	4	34.55	0.22
MOL011968	coumarin,glycoside	534.61	1.66	5	11	33.07	0.78
MOL001956	Cnidilin	300.33	3.64	0	5	32.69	0.28
MOL003609	(8S)-8-(2-hydroxypropan-2-yl)-8,9-dihydrofuro[2,3-h]chromen-2-one	246.28	2.03	1	4	32.11	0.17
MOL011962	6'-Feruloylnodakenin	584.62	2.51	4	12	32.02	0.67
MOL002203	Exceparl M-OL	296.55	7.09	0	2	31.9	0.16
MOL011737	divaricatacid	320.32	1.34	2	7	87	0.32
MOL000011	(2R,3R)-3-(4-hydroxy-3-methoxy-phenyl)-5-methoxy-2-methylol-2,3-dihydropyrano[5,6-h][1,4]benzodioxin-9-one	386.38	2.49	2	8	68.83	0.66
MOL011732	anomalin	426.5	5.05	0	7	59.65	0.66
MOL011730	11-hydroxy-sec-o-beta-d-glucosylhamaudol_qt	292.31	0.88	3	6	50.24	0.27
MOL011755	5-methoxy-8-hydroxypsoralen	232.2	1.92	1	5	48.4	0.15
MOL011749	phelloptorin	300.33	3.64	0	5	43.39	0.28
MOL011746	isopimpinellin	246.23	2.17	0	5	43.14	0.17
MOL001494	Mandenol	308.56	6.99	0	2	42	0.19
MOL001889	Methyl linolelaidate	294.53	6.64	0	2	41.93	0.17
MOL007514	methyl icosa-11,14-dienoate	322.59	7.55	0	2	39.67	0.23
MOL013077	Decursin	328.39	3.96	0	5	39.27	0.38
MOL011753	5-O-Methylvisamminol	290.34	2.02	1	5	37.99	0.25
MOL003588	Prangenidin	270.3	3.79	1	4	36.31	0.22
MOL011747	ledebouriellol	374.42	2.8	2	7	32.05	0.51
MOL011648	METHYL 10-OCTADECENOATE	296.55	7.09	0	2	31.9	0.17
MOL011754	4-hydroxy-9-methoxyfuro[3,2-g]chromen-7-one	232.2	1.92	1	5	31.78	0.15
MOL011740	divaricatol	334.35	1.25	2	7	31.65	0.38
MOL003330	(-)-Phillygenin	372.45	2.38	1	6	95.04	0.57
MOL003358	Euxanthone	228.21	2.43	2	4	92.98	0.16
MOL003306	ACon1_001697	372.45	2.38	1	6	85.12	0.57
MOL003322	FORSYTHINOL	372.45	2.38	1	6	81.25	0.57
MOL003370	Onjixanthone I	302.3	2.65	1	6	79.16	0.3
MOL000791	bicuculline	367.38	2.83	0	7	69.67	0.88
MOL003283	(2R,3R,4S)-4-(4-hydroxy-3-methoxy-phenyl)-7-methoxy-2,3-dimethylol-tetralin-6-ol	360.44	2.25	4	6	66.51	0.39
MOL003308	(+)-pinoresinol monomethyl ether-4-D-beta-glucoside_qt	372.45	2.38	1	6	61.2	0.57
MOL000211	Mairin	456.78	6.52	2	3	55.38	0.78
MOL003295	(+)-pinoresinol monomethyl ether	372.45	2.38	1	6	53.08	0.57
MOL003290	(3R,4R)-3,4-bis[(3,4-dimethoxyphenyl)methyl]oxolan-2-one	386.48	3.97	0	6	52.3	0.48
MOL003347	hyperforin	536.87	8.62	1	4	44.03	0.6
MOL003348	adhyperforin	550.9	9.07	1	4	44.03	0.61
MOL003344	β-amyrin acetate	468.84	7.68	0	2	42.06	0.74
MOL003365	Lactucasterol	426.75	6.72	1	2	40.99	0.85
MOL003281	20(S)-dammar-24-ene-3β,20-diol-3-acetate	486.86	7.34	1	3	40.23	0.82
MOL003305	PHILLYRIN	534.61	0.48	4	11	36.4	0.86
MOL000522	arctiin	534.61	1.81	4	11	34.45	0.84
MOL003315	3beta-Acetyl-20,25-epoxydammarane-24alpha-ol	502.86	6.04	1	4	33.07	0.79
MOL003120	Loniceracetalide A_qt	298.37	0.59	1	6	89.38	0.17
MOL003122	Loniceracetalide B_qt	298.37	0.59	1	6	89.28	0.17
MOL003006	(-)-(3R,8S,9R,9aS,10aS)-9-ethenyl-8-(beta-D-glucopyranosyloxy)-2,3,9,9a,10,10a-hexahydro-5-oxo-5H,8H-pyrano[4,3-d]oxazolo[3,2-a]pyridine-3-carboxylic acid_qt	281.29	-0.96	2	7	87.47	0.23
MOL003117	Ioniceracetalides B_qt	314.37	1	1	7	61.19	0.19
MOL003111	Centauroside_qt	434.48	0.38	2	9	55.79	0.5
MOL003108	Caeruloside C	550.57	-3.7	7	15	55.64	0.73
MOL003014	secologanic dibutylacetal_qt	384.57	3.58	1	6	53.65	0.29
MOL003095	5-hydroxy-7-methoxy-2-(3,4,5-trimethoxyphenyl)chromone	358.37	2.8	1	7	51.96	0.41
MOL003128	dinethylsecologanoside	434.44	-0.79	4	12	48.46	0.48
MOL003059	kryptoxanthin	552.96	10.76	1	1	47.25	0.57
MOL003101	7-epi-Vogeloside	432.47	-0.19	4	11	46.13	0.58
MOL001495	Ethyl linolenate	306.54	6.55	0	2	46.1	0.2
MOL003036	ZINC03978781	412.77	7.64	1	1	43.83	0.76
MOL003124	XYLOSTOSIDINE	415.51	-1.66	4	9	43.17	0.64
MOL003094	(E,E,E)-3,7-11,16-tetramethyl hexadeca-2,6,10,14-tetraen-1-ol	290.54	6.6	1	1	42.48	0.14
MOL003103	Methyl octadeca-8,11-dienoate	294.53	6.64	0	2	41.93	0.17
MOL002914	Eriodyctiol (flavanone)	288.27	2.03	4	6	41.35	0.24
MOL003044	Chryseriol	300.28	2.32	3	6	35.85	0.27
MOL003102	7-epi-Vogeloside_qt	270.31	0.99	1	6	33.26	0.16
MOL003062	4,5'-Retro-.beta.,.beta.-Carotene-3,3'-dione, 4',5'-didehydro-	562.9	9.27	0	2	31.22	0.55
MOL000695	patchouli alcohol	222.41	3.43	1	1	101.96	0.14
MOL005907	ZINC02090576	220.39	2.4	1	1	77.74	0.16
MOL005890	pachypodol	356.4	2.99	1	6	75.06	0.4
MOL005911	5-Hydroxy-7,4'-dimethoxyflavanon	300.33	2.8	1	5	51.54	0.27
MOL005921	quercetin 7-O-β-D-glucoside	300.28	2.17	5	6	49.57	0.27
MOL002879	Diop	390.62	7.44	0	4	43.59	0.39
MOL005922	Acanthoside B	580.64	0.2	5	13	43.35	0.77
MOL005918	phenanthrone	293.34	4.27	0	3	38.7	0.33
MOL005884	patchoulan 1,12-diol	262.43	1.46	2	2	38.17	0.25
MOL005916	irisolidone	314.31	2.3	2	6	37.78	0.3
MOL005573	Genkwanin	284.28	2.59	2	5	37.13	0.24
MOL002523	()-Cyclosativene	204.39	3.59	0	0	33.43	0.15
MOL005923	3,23-dihydroxy-12-oleanen-28-oic acid	518.56	1.09	4	11	30.86	0.86
MOL004550	Pomolic acid	472.78	5.32	3	4	16.85	0.73
MOL000511	ursolic acid	456.78	6.47	2	3	16.77	0.75
MOL000263	oleanolic acid	456.78	6.42	2	3	29.02	0.76
MOL012198	Siaresinolic acid	472.78	5.39	3	4	16.92	0.74
MOL003871	Chlorogenic acid	354.34	-0.27	6	9	13.61	0.31
MOL006503	4-Caffeoylquinic acid	354.34	-0.42	6	9	24.5	0.33
MOL006502	3,5-Di-O-caffeoylquinic acid	516.49	1.56	7	12	1.79	0.68
MOL000414	Caffeate	180.17	1.37	3	4	54.97	0.05
MOL006218	Methyl caffeate	194.2	1.62	2	4	30.68	0.06
MOL002049	Ferulaldehyde	178.2	1.67	1	3	49.26	0.05
MOL000365	syringaresinol	418.48	2.1	2	8	3.29	0.72
MOL009009	medioresinol	388.45	2.12	2	7	87.19	0.62
MOL001807	syringic acid	198.19	1.13	2	5	47.78	0.06
MOL003177	Syringaldehyde	182.19	1.29	1	4	67.06	0.05
MOL000105	protocatechuic acid	154.13	0.9	3	4	25.37	0.04
MOL000295	alexandrin	576.95	6.34	4	6	20.63	0.63
	Molecule Name	Molecular Formula	MW	CAS	Pubchem ID	InChiKey
1	clerosterol	C29H48O	412.7	2364-23-0	5283638	GHGKPLPBPGYSOO-FBZNIEFRSA-N
2	19-dehydroursolic acid	C30H46O3	454.7	6812-98-2	12315243	HKJOHXSLBNLQHF-OXLNSTONSA-N
3	ilexoside XXIX	C36H57NaO12S	736.9		101638830	DGAQECJNVWCQMB-PUAWFVPOSA-M
4	ilexoside B	C35H56O8	604.8	108544-40-7	101146540	MFIXLWYJTVEVGO-DNOHTNDQSA-N
5	oblonganoside B	C41H64O12	748.9		16216518	FZAISUXFKLLWQD-CTMYKBMWSA-N
6	ilexolic acid	C30H46O3	454.7	6756-14-5	86334789	GPQBTLJRTQXVOM-IQMUNOMNSA-N
7	Daucosterol	C35H60O6	576.8	474-58-8	5742590	NPJICTMALKLTFW-OFUAXYCQSA-N
8	ilexasoside A	C37H58O10	662.8		101578474	MVNDELOPLPPJLI-CYYRADHFSA-N
9	methyl caffeate	C10H10O4	194.18	3843-74-1	689075	OCNYGKNIVPVPPX-HWKANZROSA-N
10	Cryptochlorogenic acid	C16H18O9	354.31	905-99-7	9798666	GYFFKZTYYAFCTR-AVXJPILUSA-N
11	Methyl3,5-di-O-E-caffeoyl-quinate	C26H26O12	530	159934-13-1	10075681	VEBNYMXKXIIGFX-IYVYCCGLSA-N
12	Ilekudinoside D	C41H66O14	783		21635824	OQQOYQUBUVPAAU-IHTHYQCPSA-N
13	ilekudinoside B	C42H66O15	811		44566330	HCFFYRGPTPKLPK-IWTZTSGBSA-N
14	Rotundioside B	C54H87O26S	1184.3	99633-18-8	441943	ZUXZMGHPLSOYHC-JYJHDFCMSA-M
15	ilexside II	C47H76O18	929.1		21635825	RJERVICEUNVSDW-YZIKYWQWSA-N
16	ilexsaponin B2	C47H76O17	913.1	108906-69-0	73813191	KWHRIYSRPSARCX-UHFFFAOYSA-N
17	oblonganoside M	C41H66O14	783		76315518	SLDDOPKHRWHRBZ-PRKVZQOTSA-N
18	rotundinoside A	C54H87O27S	1201.33	99633-17-7	101426595	OXAWPYDAXHYZTK-SSSPMTHXSA-M
